# Supplementary material
Source: PubMed Central journal article supplement (PMC8357796)

**Table S1. Characteristics of the ED cohort and the three trajectories probability classes.**

|                                    | <b>Total</b> | <b>Chronic</b> | <b>Remitting</b> | <b>Resilient</b> |
|------------------------------------|--------------|----------------|------------------|------------------|
| <b>Number of Subjects (%)</b>      | 377          | 41 (10.9%)     | 124 (32.9%)      | 212 (56.2%)      |
| <b>Sex (% Females)</b>             | 47.0%        | 61.0%          | 56.1%            | 39.10%           |
| <b>Age (SD)</b>                    | 36.0 (12.8)  | 34.1 (11.0)    | 36.9 (13.5)      | 35.9 (12.8)      |
| <b>Race</b>                        |              |                |                  |                  |
| <b>African ancestry</b>            | 75.5%        | 80.5%          | 82.9%            | 70.3%            |
| <b>European ancestry</b>           | 16.5%        | 9.8%           | 11.4%            | 20.7%            |
| <b>Other</b>                       | 8.0%         | 9.8%           | 5.7%             | 9.0%             |
| <b>Trauma</b>                      |              |                |                  |                  |
| <b>No Sexual Assault</b>           | 6.9%         | 4.9%           | 11.3%            | 4.7%             |
| <b>Sexual Assault</b>              | 6.1%         | 17.1%          | 7.3%             | 3.3%             |
| <b>Road Accidents<sup>a</sup></b>  | 70.3%        | 56.1%          | 66.9%            | 75.0%            |
| <b>Gun Accidents</b>               | 4.5%         | 9.8%           | 3.2%             | 4.2%             |
| <b>Stabbing</b>                    | 2.4%         | 2.4%           | 3.2%             | 1.9%             |
| <b>Animal Bites</b>                | 1.1%         | 2.4%           | 0.8%             | 0.9%             |
| <b>Other</b>                       | 8.8%         | 7.3%           | 7.3%             | 9.9%             |
| <b>Education</b>                   |              |                |                  |                  |
| <b>Some HS or less</b>             | 13.6%        | 19.5%          | 13.8%            | 12.3%            |
| <b>HS graduate</b>                 | 27.1%        | 31.7%          | 28.5%            | 25.5%            |
| <b>AA/some college</b>             | 40.2%        | 39.0%          | 42.3%            | 39.2%            |
| <b>BS/BA</b>                       | 14.1%        | 7.3%           | 9.8%             | 17.9%            |
| <b>Master/PhD</b>                  | 5.0%         | 2.4%           | 5.7%             | 5.2%             |
| <b>Baseline PTSD symptoms (SD)</b> | 9.3 (9.9)    | 17.9 (12.1)    | 12.2 (9.6)       | 6.1 (7.9)        |

<sup>a</sup>Road Accidents includes motor vehicles crashes, and pedestrians and bike accidents.

**Table S2. Low expression in *GRIN3B* and *AMOTL1* genes predicts resilience during a 12-month period.**

| <b>GENE</b>   | <b>logFC</b> | <b>AveExpr</b> | <b>t</b> | <b>P-Value</b>        | <b>FDR</b> |
|---------------|--------------|----------------|----------|-----------------------|------------|
| <i>GRIN3B</i> | -0.75        | 1.12           | -5.30    | 4.50x10 <sup>-7</sup> | 0.0063     |
| <i>AMOTL1</i> | -0.78        | 0.57           | -4.83    | 3.63x10 <sup>-6</sup> | 0.0253     |

FC: Fold Change

AveExp: average expression

FDR: adjusted P-values using False Discovery Rate

**Table S4. *GRIN3B* expression levels associate with PSS symptoms over a 12-month period.**

| <b>PSS</b> | <b>Estimate</b> | <b>SE</b> | <b>t-value</b> | <b>Pr(&gt; t )</b>   |
|------------|-----------------|-----------|----------------|----------------------|
| Baseline   | -0.0008         | 0.0027    | -0.3           | 0.7647               |
| 1-month    | 0.0049          | 0.0025    | 1.985          | 0.0486               |
| 3-month    | 0.0085          | 0.0028    | 3.071          | 0.0025               |
| 6-month    | 0.0112          | 0.0027    | 4.119          | 6.3x10 <sup>-5</sup> |
| 12-month   | 0.0095          | 0.0032    | 2.998          | 0.0033               |

SE Standard Error

**Table S5. WGCNA Modules association in resilience vs chronic class-trajectory**

| <b>module</b> | <b>logFC</b> | <b>AveExpr</b> | <b>t</b> | <b>P.Value</b> | <b>adj.P.Val</b> |
|---------------|--------------|----------------|----------|----------------|------------------|
| <b>ME26</b>   | -0.0257      | 0.0003         | -1.8462  | 0.0670         | 0.7191           |
| <b>ME15</b>   | -0.0209      | 0.0016         | -1.7024  | 0.0909         | 0.7191           |
| <b>ME32</b>   | 0.0184       | 0.0069         | 1.4864   | 0.1394         | 0.7191           |
| <b>ME22</b>   | -0.0211      | 0.0030         | -1.4840  | 0.1401         | 0.7191           |
| <b>ME23</b>   | 0.0115       | 0.0026         | 1.3835   | 0.1687         | 0.7191           |
| <b>ME9</b>    | -0.0165      | 0.0039         | -1.3682  | 0.1734         | 0.7191           |
| <b>ME30</b>   | 0.0186       | 0.0001         | 1.3437   | 0.1812         | 0.7191           |
| <b>ME3</b>    | -0.0172      | -0.0060        | -1.3287  | 0.1861         | 0.7191           |
| <b>ME8</b>    | -0.0183      | -0.0022        | -1.2772  | 0.2037         | 0.7191           |
| <b>ME33</b>   | -0.0163      | -0.0019        | -1.2700  | 0.2062         | 0.7191           |
| <b>ME4</b>    | -0.0171      | -0.0020        | -1.2435  | 0.2158         | 0.7191           |
| <b>ME5</b>    | 0.0106       | 0.0039         | 1.2286   | 0.2213         | 0.7191           |
| <b>ME13</b>   | -0.0127      | -0.0024        | -1.1739  | 0.2424         | 0.7273           |
| <b>ME7</b>    | -0.0176      | -0.0005        | -1.1142  | 0.2671         | 0.7378           |
| <b>ME19</b>   | 0.0154       | 0.0019         | 0.9844   | 0.3266         | 0.7378           |
| <b>ME27</b>   | -0.0104      | 0.0082         | -0.9813  | 0.3281         | 0.7378           |
| <b>ME20</b>   | 0.0080       | 0.0047         | 0.9594   | 0.3390         | 0.7378           |
| <b>ME24</b>   | 0.0135       | -0.0023        | 0.9564   | 0.3405         | 0.7378           |
| <b>ME12</b>   | 0.0114       | 0.0012         | 0.8766   | 0.3822         | 0.7554           |
| <b>ME21</b>   | 0.0097       | 0.0028         | 0.8385   | 0.4032         | 0.7554           |
| <b>ME18</b>   | 0.0087       | 0.0032         | 0.7715   | 0.4417         | 0.7554           |
| <b>ME25</b>   | 0.0077       | -0.0005        | 0.7600   | 0.4485         | 0.7554           |
| <b>ME35</b>   | -0.0089      | 0.0029         | -0.7436  | 0.4584         | 0.7554           |
| <b>ME2</b>    | -0.0058      | 0.0035         | -0.6991  | 0.4857         | 0.7554           |
| <b>ME10</b>   | -0.0082      | 0.0032         | -0.6915  | 0.4904         | 0.7554           |
| <b>ME1</b>    | 0.0041       | -0.0059        | 0.6342   | 0.5270         | 0.7554           |
| <b>ME34</b>   | -0.0103      | -0.0001        | -0.5973  | 0.5513         | 0.7554           |
| <b>ME11</b>   | 0.0051       | 0.0075         | 0.5823   | 0.5613         | 0.7554           |
| <b>ME14</b>   | 0.0040       | 0.0000         | 0.5817   | 0.5617         | 0.7554           |
| <b>ME38</b>   | 0.0062       | 0.0024         | 0.3537   | 0.7241         | 0.9193           |
| <b>ME17</b>   | 0.0042       | -0.0050        | 0.3448   | 0.7307         | 0.9193           |
| <b>ME36</b>   | -0.0046      | 0.0002         | -0.2741  | 0.7844         | 0.9201           |
| <b>ME31</b>   | 0.0029       | -0.0033        | 0.2424   | 0.8088         | 0.9201           |
| <b>ME6</b>    | 0.0019       | -0.0035        | 0.1977   | 0.8436         | 0.9201           |
| <b>ME28</b>   | -0.0020      | -0.0023        | -0.1903  | 0.8494         | 0.9201           |
| <b>ME29</b>   | -0.0014      | -0.0044        | -0.0788  | 0.9373         | 0.9748           |
| <b>ME37</b>   | 0.0009       | 0.0023         | 0.0631   | 0.9498         | 0.9748           |
| <b>ME16</b>   | -0.0004      | 0.0023         | -0.0303  | 0.9759         | 0.9759           |

**Table S6. Characteristics of the Grady Trauma Project Cohort.**

| <b>Characteristics</b>        | <b>Total</b> | <b>PSS ≤ 7</b> | <b>PSS ≥ 19</b> |
|-------------------------------|--------------|----------------|-----------------|
| <b>Number of Subjects (%)</b> | 5248         | 2186           | 1335            |
| <b>Sex (% Females)</b>        | 75.2%        | 72.9%%         | 76.5%%          |
| <b>Mean PSS-Symptoms (SD)</b> | 12.5 (12.1)  | 2.4 (2.4)      | 29.2(7.5)       |
| <b>Age</b>                    | 39.9 (13.9)  | 40.2(14.7)     | 40.3(12.3)      |

All individuals were of African ancestry

Total Median was 9 (minimum 0 and maximum 51)

**Table S7. Genetic association analyses for five<sup>a</sup> *GRIN3B* variants and PTSD in the GTP dataset.**

| <b>Variants</b>   | <b>MAF</b>   | <b>(A1/A2)<sup>b</sup></b> | <b>N</b>    | <b>OR</b>   | <b>SE</b>    | <b>P</b>      |
|-------------------|--------------|----------------------------|-------------|-------------|--------------|---------------|
| <b>rs10401454</b> | <b>0.235</b> | <b>G/C</b>                 | <b>3521</b> | <b>1.13</b> | <b>0.059</b> | <b>0.0359</b> |
| <b>rs10666583</b> | <b>0.113</b> | <b>GCGTT/G<sup>c</sup></b> | <b>3490</b> | <b>0.86</b> | <b>0.076</b> | <b>0.0442</b> |
| rs2240158         | 0.484        | C/T                        | 3521        | 1.05        | 0.049        | 0.3505        |
| rs4806908         | 0.311        | A/G                        | 3488        | 0.96        | 0.053        | 0.4935        |
| rs8109756         | 0.475        | T/C                        | 3521        | 0.10        | 0.049        | 0.9741        |

**PTSD cases had PSS >19; controls had PSS <7**

<sup>a</sup>Four of these variants (rs10401454, rs2240158, rs4806908, rs8109756) are blood eQTL in our study; rs10666583 is a stop mutation previously associated with SCZ in previous studies.

<sup>b</sup> A1/A2 indicate the two different alleles; A1 is the reference minor allele.

<sup>c</sup>4 bases insertion.

**Table S8. Association between *GRIN3B* eQTLs and symptom trajectories in the ED cohort.**

| SNP                                             | A1    | MAF          | N          | BETA          | SE            | P            |
|-------------------------------------------------|-------|--------------|------------|---------------|---------------|--------------|
| <b>Chronic-PTSD vs. Remitting vs. Resilient</b> |       |              |            |               |               |              |
| <b>rs2240158</b>                                | T     | <b>0.442</b> | <b>269</b> | <b>-0.154</b> | <b>0.0643</b> | <b>0.017</b> |
| <b>rs4806908</b>                                | A     | <b>0.262</b> | <b>113</b> | <b>-0.254</b> | <b>0.1113</b> | <b>0.024</b> |
| rs8109756                                       | T     | 0.395        | 269        | -0.056        | 0.0653        | 0.393        |
| rs10401454                                      | G     | 0.267        | 269        | 0.045         | 0.0709        | 0.527        |
| rs10666583*                                     | INDEL | 0.117        | 228        | 0.050         | 0.1188        | 0.674        |
| <b>Chronic-PTSD vs. Resilient</b>               |       |              |            |               |               |              |
| rs4806908                                       | A     | <b>0.442</b> | 84         | -0.885        | 0.4862        | 0.069        |
| rs2240158                                       | T     | <b>0.262</b> | 181        | -0.377        | 0.3122        | 0.227        |
| rs10401454                                      | G     | 0.395        | 181        | 0.309         | 0.3571        | 0.387        |
| rs8109756                                       | T     | 0.267        | 181        | -0.249        | 0.3053        | 0.415        |
| rs10666583*                                     | INDEL | 0.117        | 160        | 0.476         | 0.6561        | 0.468        |

**Note: ODD-RATIOS were changed to beta for logistic regression to compare directions among different phenotypes.**

**\*This null variant was associated with SCZ in two previous studies.**

**Figure S1. Trajectories of PTSD symptoms across one year after trauma exposure.**

Trajectories of PTSD severity symptoms (y-axis) are plotted across baseline, 1, 3, 6, and 12 months after trauma exposure. Trajectories were calculated using a latent growth mixture modeling, excluding baseline. Colors define the different trajectories classes, with red indicating chronicity (10.9%), green remittance (32.9%), and blue resilience (56.2%). Means and SDs of the severity symptoms at each data point are displayed.

**Figure S2.** Box and Whiskers plots of blood mRNA expressions level for *GRIN3B* and *AMOLTI* comparing three different categories (chronic, recovery, and resilience). Y-axis shows gene expression values. A. *GRIN3B* expression levels gradually decrease from chronic to recovery to resilience, mimicking a dose-effect response ( $p=1.04 \times 10^{-5}$ ;  $t=-4.5$ ). B. *AMOLRI* expression levels in the three-class trajectory ( $t=2.7$   $p=0.0083$ ) does not show a comparable dose-effect response.

**Figure S3.** Plots representing brain expression level from brain regions derived from public databases. A-B BrainCloud. Rs10401454 associates with expression values from dorsolateral prefrontal cortices (DLPFCs) from 412 subjects (175 patients with schizophrenia) (A) and control only B. C-D GTEx. Plot representing brain cortex and frontal cortex expression levels changing with rs10401454 different genotypes (from GTEx portal) for Brain Cortex (C) and Frontal Cortex (D).

**Figure S4.** *GRIN3B* rs10401454 eQTL for 49 tissues, including brain and whole blood from GTEx. NES indicates the normalized effect size; p is the eQTL p-value for each tissue. **M-value** indicates the posterior probability that an eQTL effect exists in each tissue tested in the cross-tissue meta-analysis; m-values range between 0 and 1, with 0 predicting not having an effect, and 1 predicting having an effect (2)

1. Hinrichs R, van Rooij SJ, Michopoulos V, Schultebraucks K, Winters S, Maples-Keller J, Rothbaum AO, Stevens JS, Galatzer-Levy I, Rothbaum BO, Ressler KJ, Jovanovic T. Increased Skin Conductance Response in the Immediate Aftermath of Trauma Predicts PTSD Risk. *Chronic Stress* (Thousand Oaks). 2019;3. Epub 2019/06/11. doi: 10.1177/2470547019844441. PubMed PMID: 31179413; PMCID: PMC6553652.
2. Han B, Eskin E. Interpreting meta-analyses of genome-wide association studies. *PLoS Genet*. 2012;8(3):e1002555. Epub 2012/03/08. doi: 10.1371/journal.pgen.1002555. PubMed PMID: 22396665; PMCID: PMC3291559.



**Figure S1. Trajectories of symptoms of PTSD across one year after trauma.**

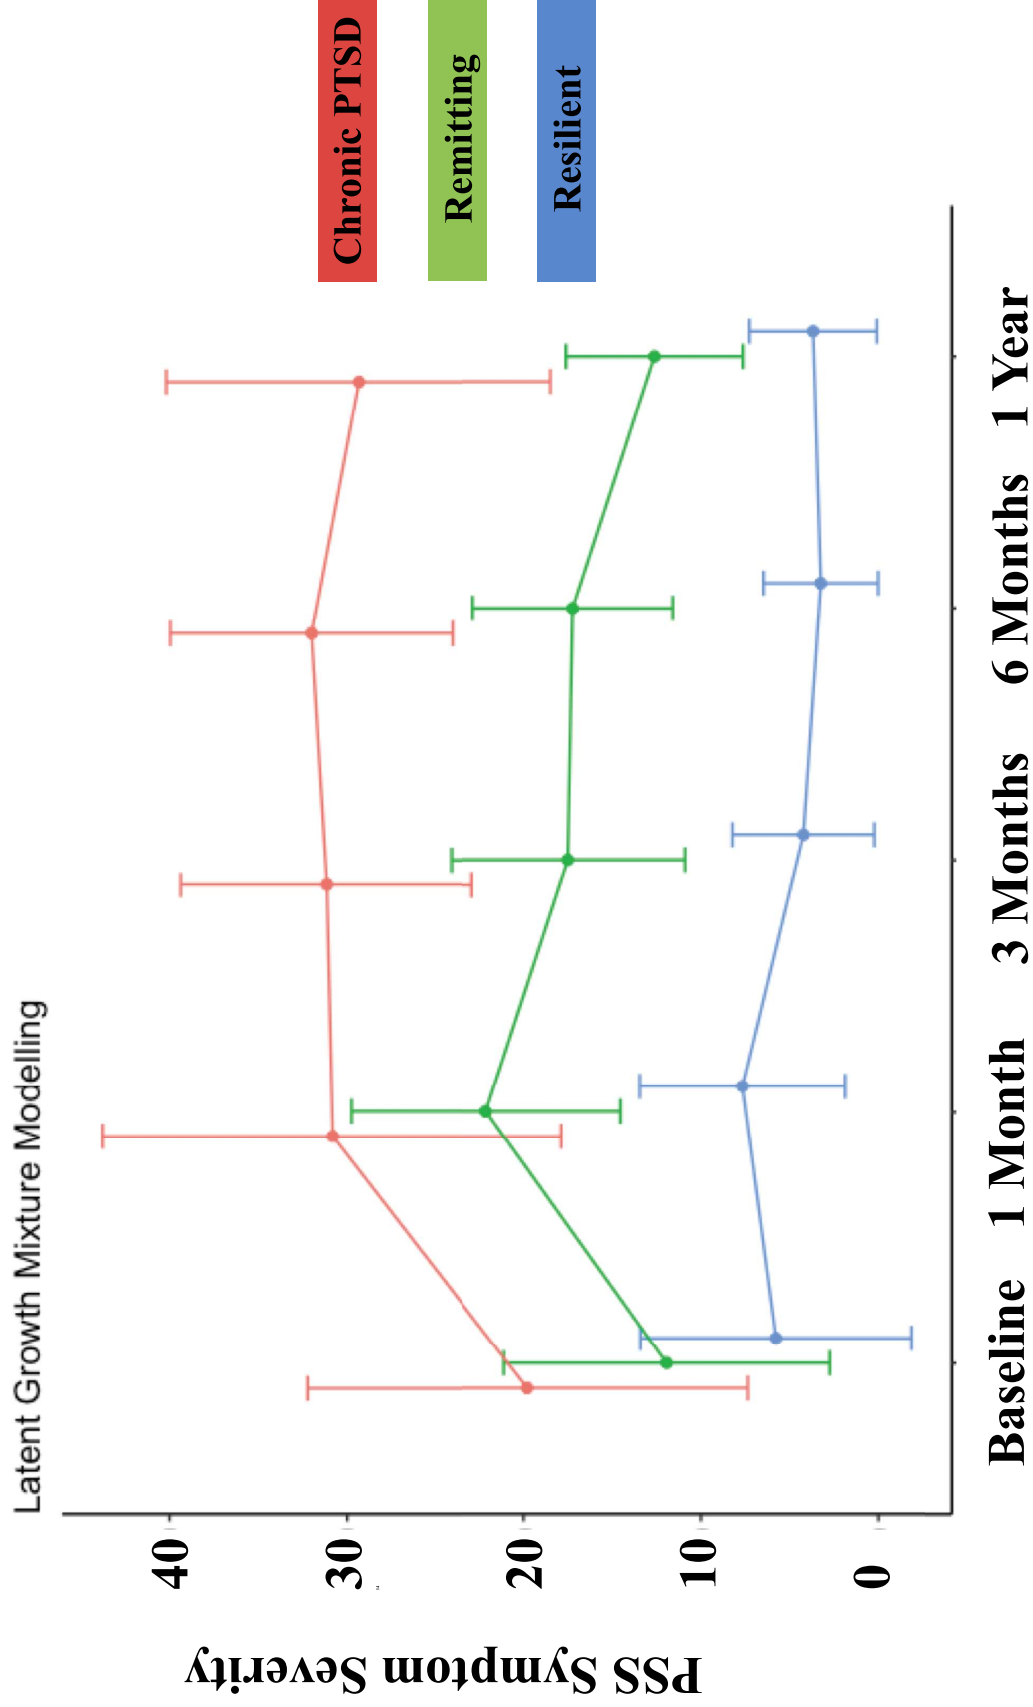

**Figure S2. *GRIN3B* and *AMOLT1* expression profiles of the three class trajectories**

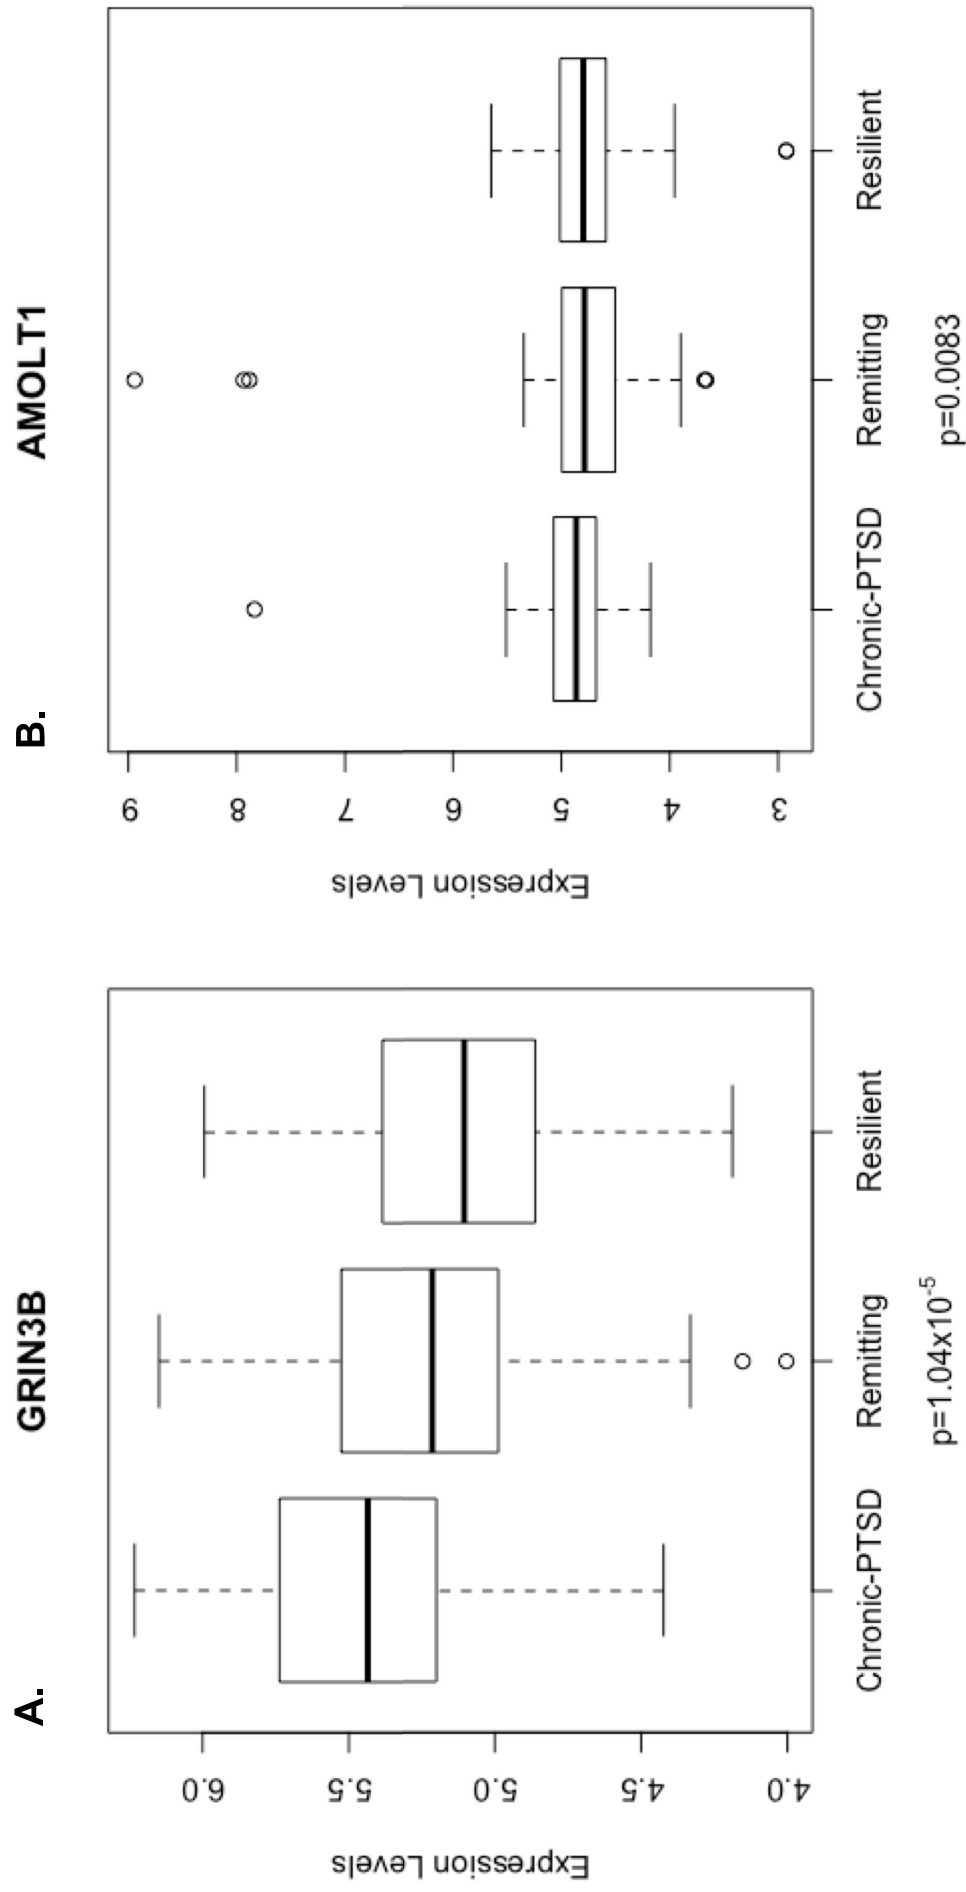

**Figure S3. Brain eQTL for rs10401454 from Brain Cloud and GTEx**

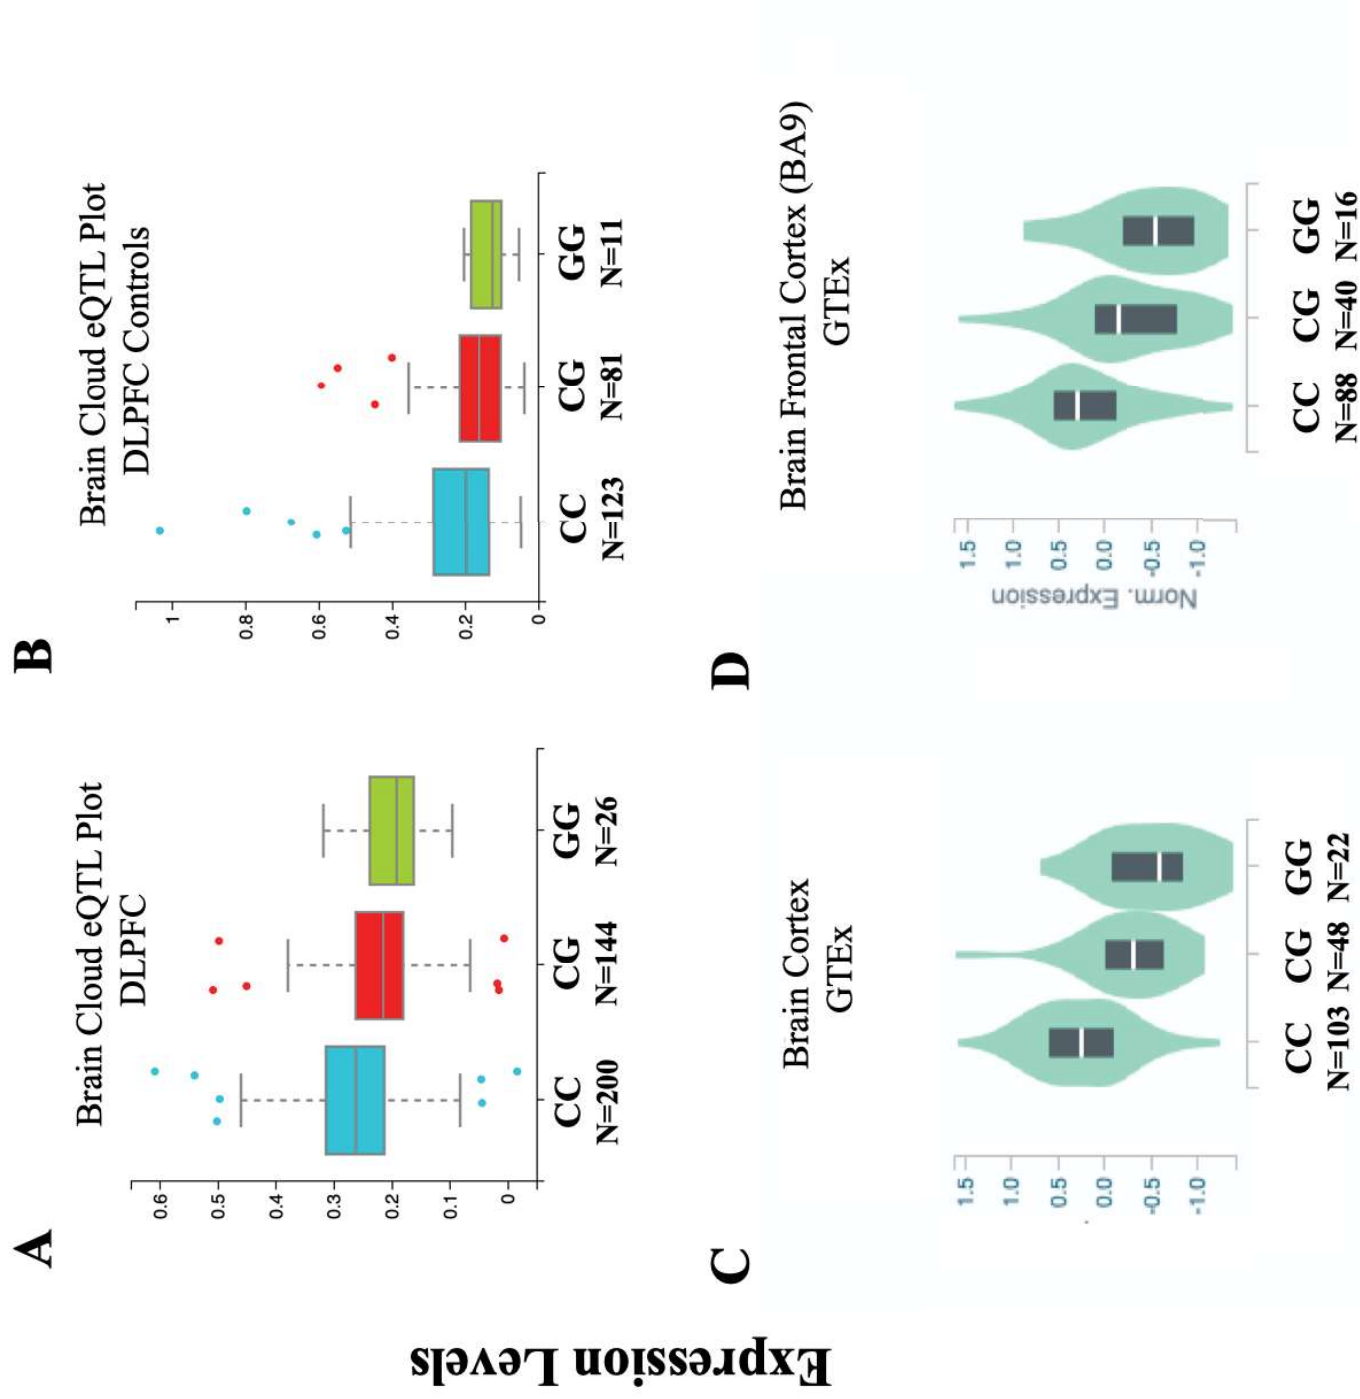

**Figure S4. *GRIN3B* rs10401454 RNA regulation of multi tissues (GTEx)**

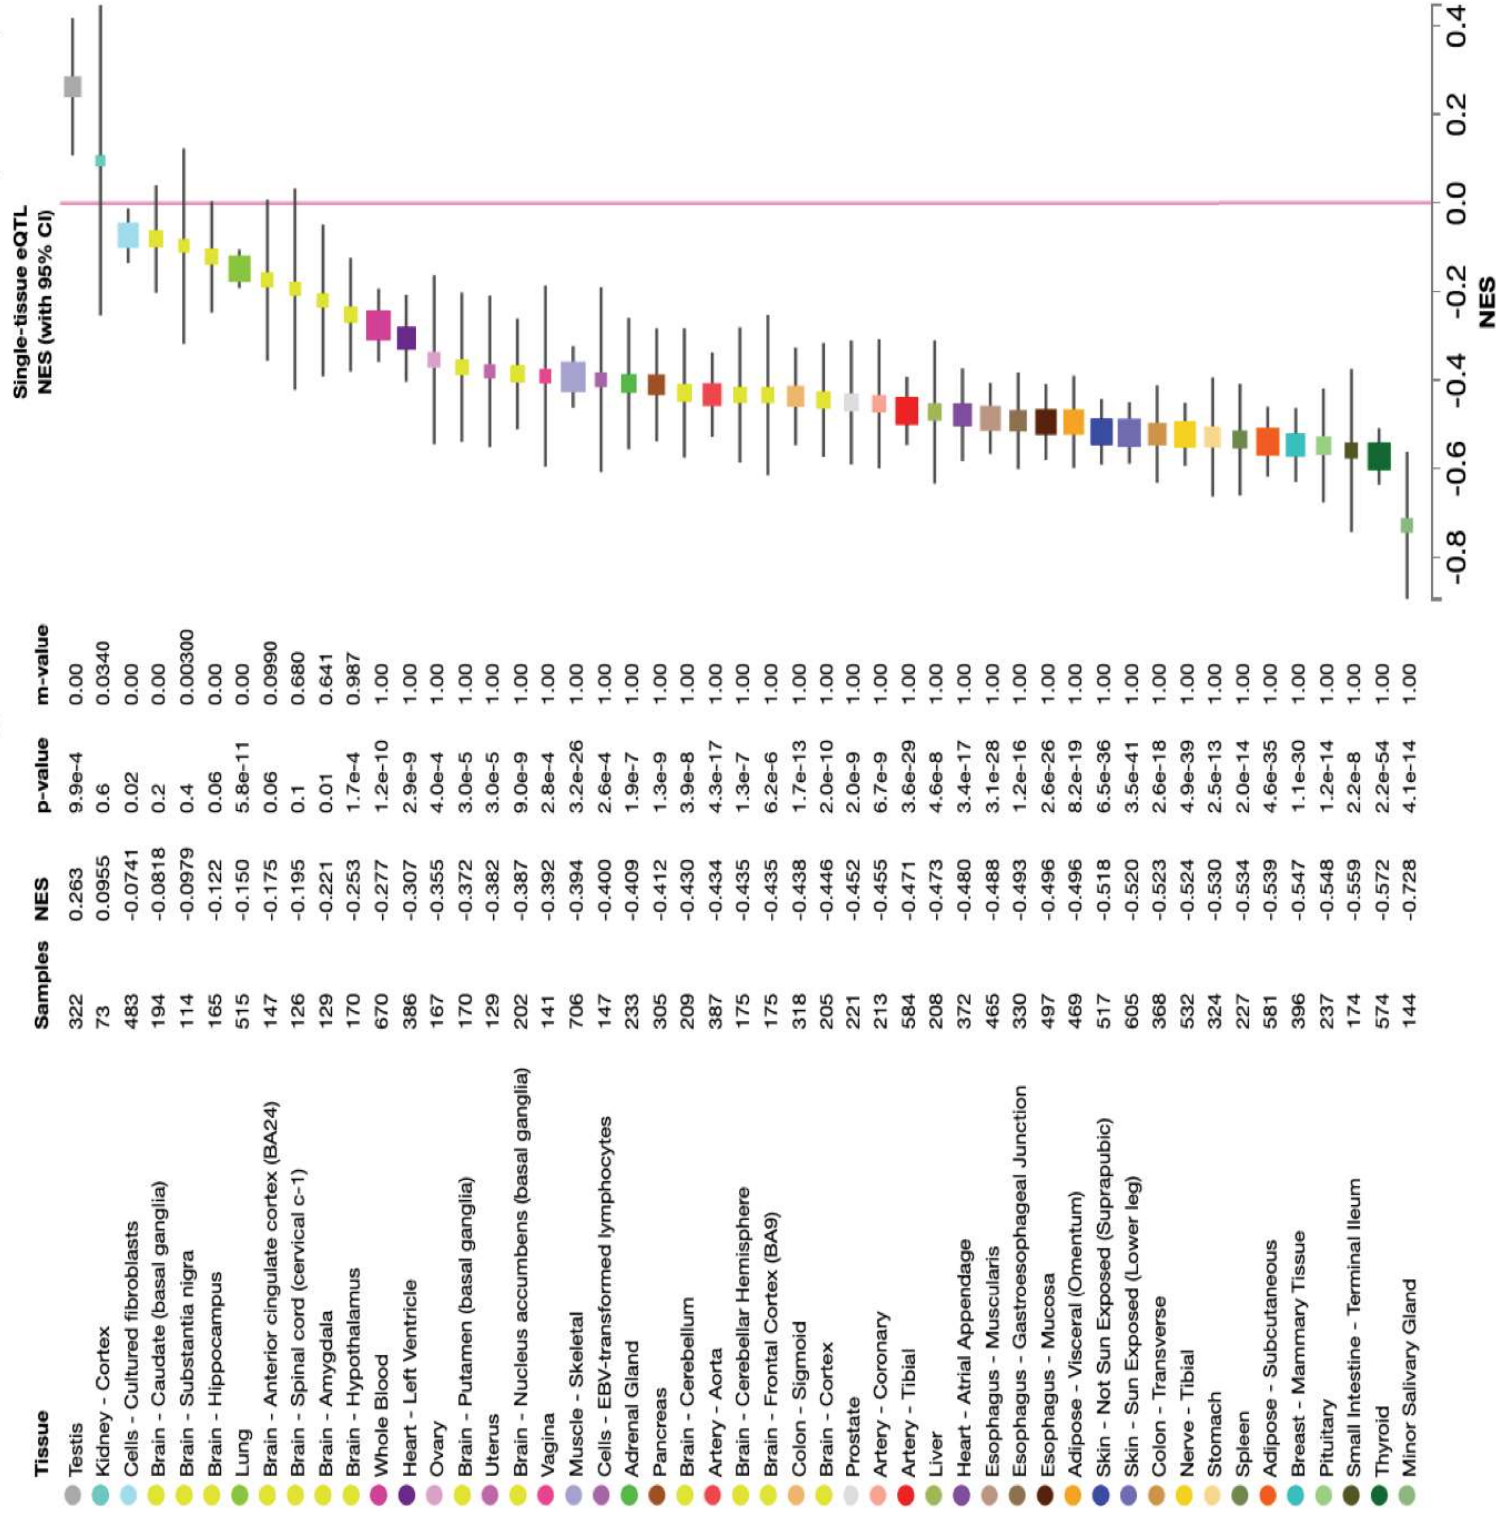

Supplement: 41386_2021_1073_MOESM1_ESM.pdf [file 41386_2021_1073_MOESM1_ESM.pdf]
